# Supplementary material
Source: publisher figshare collection journal article supplement (https://tandf.figshare.com/articles/dataset/_/15025392)
Supplement: Supplementary file 2 [file 2]

## Supplemental Material A: Recruitment of Healthcare Professionals

| Hospital                                    | Way of recruitment                                                | Participants asked to participate | Participants interviewed |
|---------------------------------------------|-------------------------------------------------------------------|-----------------------------------|--------------------------|
| <b>Gynecologists and residents</b>          |                                                                   |                                   |                          |
| Gelre Hospitals, Apeldoorn and Zutphen      | Asked personally (network of researcher)                          | 3 G                               | 3 G                      |
| Radboud university medical center, Nijmegen | General e-mail to head of department                              | 1 G; 1 R                          | 1 G                      |
| Canisius Wilhelmina Hospital, Nijmegen      | General e-mail to head of department;                             | 1 G; 1 R                          | 1G; 1 R                  |
| Maastad Hospital, Rotterdam                 | Direct e-mail to G (network of researcher)                        | 1 G; 1 R                          | 1G; 1 R                  |
| Antonius Hospital, Utrecht                  | Direct e-mail to G (network of researcher)                        | 1 G                               | 1 G                      |
| Amsterdam University Medical Center         | General e-mail to head of department;                             | 1 G; 1 R                          | 1 R                      |
|                                             | Direct e-mail to 3 G (network of researcher)                      | 3 G                               |                          |
| Deventer Hospitals, Deventer                | Direct e-mail to 2 G (network of researcher)                      | 2 G                               | 0                        |
| Medisch Spectrum Twente, Enschede           | Direct e-mail to 1 G (network of researcher)                      | 1 G                               | 0                        |
| Rivierenland Hospital, Tiel                 | General e-mail to head of department                              | 0                                 | 0                        |
| <b>Total</b>                                |                                                                   | 14 G; 4 R                         | 7 G; 3 R                 |
| <b>Physical Therapists</b>                  |                                                                   |                                   |                          |
| Gelre Hospitals Apeldoorn                   | Direct e-mail to 6 physical therapists<br>(network of researcher) | 6                                 | 5                        |
| <b>Dieticians</b>                           |                                                                   |                                   |                          |
| Gelre Hospitals Apeldoorn and Zutphen       | General e-mail to head of department;                             | 3                                 | 3                        |
| <b>Oncology Nurses</b>                      |                                                                   |                                   |                          |
| Gelre Hospitals Apeldoorn and Zutphen       | Direct e-mail to 2 oncology nurses<br>(network of researcher)     | 2                                 | 2                        |

G: Gynecologist; R: Resident Gynecology and Obstetrics
