# Supplementary material
Source: publisher figshare collection journal article supplement (https://tandf.figshare.com/articles/dataset/_/15025392)
Supplement: Supplementary file 3 [file 2]

| Patients    |             |                  |                   |                                                                                                                                                                     |                |            |                          |                  |                                                     |                                                |                     |                           |                                 |                                     |                                     |                                    |                                 |                 |
|-------------|-------------|------------------|-------------------|---------------------------------------------------------------------------------------------------------------------------------------------------------------------|----------------|------------|--------------------------|------------------|-----------------------------------------------------|------------------------------------------------|---------------------|---------------------------|---------------------------------|-------------------------------------|-------------------------------------|------------------------------------|---------------------------------|-----------------|
| Case number | Age (years) | Education level* | Living situation  | Medical history                                                                                                                                                     | Kind of cancer | FIGO stage | Neoadjuvant chemotherapy | Adjuvant therapy | Kind of adjuvant therapy                            | Type of surgery                                | Timing of interview | NRS General health (0-10) | NRS Importance of health (0-10) | NRS Enough physical activity (0-10) | NRS Healthy food consumption (0-10) | Average SBSQ-D (Health literacy)** | Duration of interview (min:sec) | Place interview |
| 3           | 63          | 6                | At Home           | Hypothyroidism, hypertension, stress incontinence                                                                                                                   | Endometrial    | IA         | No                       | No               |                                                     | Laparoscopic hysterectomy with adnexa          | post operative      | 7,5                       | 10                              | 6                                   | 7                                   | 3,7                                | 20:48                           | Hospital        |
| 4           | 68          | 5                | At Home           | Hypertension                                                                                                                                                        | Endometrial    | IB         | No                       | No               |                                                     | Laparoscopic hysterectomy with adnexa          | post operative      | 9                         | 8                               | 7                                   | 8                                   | 5,0                                | 36:10                           | Patient's home  |
| 5           | 63          | 7                | At Home           | Orthopedic surgery                                                                                                                                                  | Endometrial    | Ib         | No                       | No               |                                                     | Laparoscopic hysterectomy with adnexa          | post operative      | 8                         | 7,5                             | 7                                   | 7,5                                 | 4,0                                | 23:55                           | Patient's home  |
| 6           | 64          | 5                | At Home           | None                                                                                                                                                                | Endometrial    | IIIA       | No                       | Yes              | Chemotherapy and radiotherapy (incl. brachytherapy) | Laparoscopic hysterectomy with adnexa          | post operative      | 7                         | 9                               | 9                                   | 8                                   | 4,0                                | 19:50                           | Patient's home  |
| 8           | 76          | 4                | At Home           | Orthopedic surgery                                                                                                                                                  | Endometrial    | IA         | No                       | Yes              | Brachytherapy                                       | Laparoscopic hysterectomy with adnexa          | post operative      | 8                         | 10                              | 5                                   | 10                                  | 4,0                                | 14:10                           | Patient's home  |
| 25          | 69          | 4                | At Home           | None                                                                                                                                                                | Endometrial    | IA         | No                       | No               |                                                     | Laparoscopic hysterectomy with adnexa          | pre operative       | 8                         | 9                               | 9                                   | 8                                   | 4,0                                | NA                              | Patient's home  |
| 27          | 62          | 2                | At Home           | Ovariotomy, diaphragmatic hernia                                                                                                                                    | Ovarian        | III        | Yes                      | No               |                                                     | Debulking                                      | pre operative       | 8                         | 10                              | 8                                   | 7                                   | 2,0                                | 23:14                           | Teleconfer ence |
| 28          | 69          | 7                | At Home           | None                                                                                                                                                                | Ovarian        | IIIC       | Yes                      | No               |                                                     | Debulking                                      | pre operative       | 8,5                       | 7                               | 6                                   | 8                                   | 3,0                                | 24:16                           | Phone           |
| 29          | 63          | 5                | At Home           | Cholecystectomy, goiter                                                                                                                                             | Ovarian        | III        | No                       | No               |                                                     | Exploratory laparotomy                         | pre operative       | 7                         | 9                               | 4                                   | 7,5                                 | 4,0                                | 25:16                           | Teleconfer ence |
| 30          | 73          | 3                | At Home           | Hypertension                                                                                                                                                        | Ovarian        | IIIC       | Yes                      | No               | Chemotherapy                                        | Debulking                                      | post operative      | 10                        | 10                              | 6                                   | 9                                   | 3,7                                | 25:04                           | Phone           |
| 31          | 85          | 4                | At Home           | TIA, Hypertension, Diabetes mellitus, angioimmunoblastic T-cell lymphoma, chronic kidney insufficiency, atrial fibrillation, MGUS, Meniere's disease, sterilisation | Endometrial    | IB         | No                       | No               |                                                     | Laparoscopic hysterectomy with adnexa          | post operative      | 7                         | 8,5                             | 7                                   | 6                                   | 3,3                                | 39:24                           | Phone           |
| 32          | 75          | 5                | At Home           | Depression, Hypothyroidism, polymyalgia rheumatica, orthopedic surgery                                                                                              | Ovarian        | IA         | No                       | No               |                                                     | Exploratory laparotomy                         | post operative      | 6                         | 10                              | 10                                  | 8                                   | 3,0                                | 43:50                           | Phone           |
| 33          | 83          | 4                | At Home           | Irritable bowel syndrome, depression, gonartritis, diverticulitis, obesity, mamma carcinoma, Morbus Paget                                                           | Ovarian        | IB         | No                       | No               |                                                     | Wide local excision of the Vulva               | post operative      | 6                         | 10                              | 6                                   | 8                                   | 4,0                                | 19:48                           | Phone           |
| 34          | 73          | 6                | At Home           | Hysterectomy, Peripheral Artery Disease (Fontaine stadium 2), ulcus cruris venosum                                                                                  | Ovarian        | Ila        | No                       | Yes              | Chemotherapy                                        | Exploratory laparotomy                         | post operative      | 8                         | 9                               | 8                                   | 8                                   | 3,7                                | 28:44                           | Phone           |
| 35          | 71          | 6                | At Home           | Polymyalgia rheumatica, sterilisation, cholecystectomy, orthopedic surgery                                                                                          | Cervical       | IB2        | No                       | Yes              | Radiotherapy                                        | Wertheim-Meigs hysterectomy with adnexa        | post operative      | 8                         | 8                               | 7                                   | 8                                   | 3,7                                | 14:27                           | Phone           |
| 36          | 80          | 3                | Sheltered housing | Cholestyrolithiasis, appendectomy, iliac vene stenting, pacemaker placement, celiac disease, mamma carcinoma                                                        | Ovarian        | IIIC       | NA                       | NA               |                                                     | No surgery, only chemotherapy, wish of patient | NA                  | 6                         | 8                               | 4                                   | 7                                   | 2,3                                | 48:24                           | Phone           |

NA: Not applicable; NRS: Numeric Rating Scale

\*Highest education level finished, ranging from 1-8; 1: Did not finish primary school; 2: Primary school; 3: Lower secondary school; 4: Middle secondary school; 5: Post-secondary non-tertiary education; 6: Higher secondary school 7: University of applied science; 8: University

\*\* SBSQ-D: Dutch version of the Set of Brief Screening Questions for Health literacy. SBSQ-D average <2 means low health literacy, SBSQ-D average >2 means adequate health literacy.

**Healthcare professionals**

| Case number | Age (years) | Sex    | Profession                                                                            | Years worked in current profession | Kind of hospital  | NRS General health (0-10) | NRS Importance of health (0-10) | NRS Enough physical activity (0-10) | NRS Healthy food consumption (0-10) | Duration of interview (min:sec) | Place interview |
|-------------|-------------|--------|---------------------------------------------------------------------------------------|------------------------------------|-------------------|---------------------------|---------------------------------|-------------------------------------|-------------------------------------|---------------------------------|-----------------|
| 1           | 57          | Female | Gynecologist                                                                          | 25                                 | General Hospital  | 8                         | 9                               | 10                                  | 8                                   | 10:26                           | Hospital        |
| 2           | NA          | Female | Gynecologist-oncologist                                                               | 10                                 | Academic hospital | NA                        | NA                              | NA                                  | NA                                  | 15:52                           | Hospital        |
| 7           | 36          | Male   | Physical therapist (did a prehabilitation trial before in esophageal cancer patients) | 12                                 | General Hospital  | 8,5                       | 8                               | 5                                   | 7                                   | 21:46                           | Hospital        |
| 9           | 63          | Female | Physical therapist - relevant focus area: oncology and geriatrics                     | 41                                 | General Hospital  | 7                         | 9                               | 7                                   | 6                                   | 18:25                           | Hospital        |
| 10          | 34          | Female | Physical therapist - relevant focus area: geriatrics                                  | 12                                 | General Hospital  | 8                         | 8                               | 8                                   | 7                                   | 32:24                           | Hospital        |
| 11          | 48          | Female | Gynecologist - focus area oncology                                                    | 14                                 | General Hospital  | 8                         | 8                               | 6                                   | 8,5                                 | 23:10                           | Hospital        |
| 12          | 57          | Male   | Gynecologist - focus area oncology                                                    | 18                                 | General Hospital  | 8,5                       | 9                               | 8                                   | 9                                   | 13:46                           | Hospital        |
| 13          | 60          | Female | Dietician - relevant focus area: oncology                                             | 36                                 | General Hospital  | 9                         | 10                              | 7                                   | 8                                   | 25:46                           | Hospital        |
| 14          | 27          | Female | Medical Secretary/assistant Gynecology - focus area oncology                          | 1                                  | General Hospital  | 7                         | 7                               | 5                                   | 7                                   | 9:29                            | Hospital        |
| 15          | 28          | Female | Dietician - relevant focus area: oncology                                             | 6                                  | General Hospital  | 8                         | 8                               | 6                                   | 8                                   | 20:38                           | Hospital        |
| 16          | 32          | Female | Resident in Gynecology, year 5, focus area oncology                                   | 8                                  | Academic hospital | 9                         | 8                               | 10                                  | 8                                   | 12:26                           | Hospital        |
| 17          | 39          | Female | Gynecologist - focus area oncology                                                    | 5,5                                | General Hospital  | 8                         | 7                               | 1                                   | 6                                   | 13:46                           | Hospital        |
| 18          | 63          | Female | Dietician - relevant focus area: oncology                                             | 40                                 | General Hospital  | 10                        | 10                              | 8                                   | 8                                   | 21:24                           | Hospital        |
| 19          | 37          | Female | Resident in Gynecology, year 5, focus area oncology                                   | 10                                 | General Hospital  | 9                         | 9                               | 4                                   | 8                                   | 13:44                           | Hospital        |
| 20          | 54          | Female | Gynecologist - focus area oncology                                                    | 19                                 | General Hospital  | 9                         | 10                              | 7                                   | 8                                   | 20:00                           | Hospital        |
| 21          | 35          | Female | Resident in Gynecology, year 2                                                        | 8                                  | General Hospital  | 7,5                       | 7                               | 3                                   | 7,5                                 | 18:59                           | Hospital        |
| 22          | 47          | Female | Physical therapist                                                                    | 24                                 | General Hospital  | 8                         | 8                               | 8                                   | 8                                   | 17:22                           | Hospital        |
| 23          | 62          | Female | Physical therapist - relevant focus area: geriatrics                                  | 39                                 | General Hospital  | 7                         | 8                               | 7,5                                 | 9                                   | 16:59                           | Hospital        |
| 24          | 62          | Female | Oncology nurse                                                                        | 35                                 | General Hospital  | 8                         | 10                              | 7,5                                 | 8                                   | 17:50                           | Hospital        |
| 26          | 39          | Male   | Gynecologist - focus area oncology                                                    | 7                                  | General Hospital  | 9                         | 9                               | 9                                   | 7,5                                 | 11:49                           | Teleconference  |

NA: Not Applicable; NRS: Numeric Rating Scale
